# Supplementary material
Source: Springer Nature journal article supplement (https://www.springermedizin.de/resource/supplementary/13058_2008_2121_MOESM1_ESM.pdf/9700680)
Supplement: MOESM1 [file 9700680]

**Additional Data File 1 - 764 genes****Comparison among Non-neoplastic cells, pure DCIS, *in situ* component of DCIS-IDC**

| <b>GeneID</b> | <b>Symbol</b> | <b>Description</b>                                                       |
|---------------|---------------|--------------------------------------------------------------------------|
| 51393         | TRPV2         | transient receptor potential cation channel, subfamily V, member 2       |
| 64284         | RAB17         | RAB17, member RAS oncogene family                                        |
| 58533         | SNX6          | sorting nexin 6                                                          |
| 6590          | SLPI          | secretory leukocyte peptidase inhibitor                                  |
| 58472         | SQRDL         | sulfide quinone reductase-like (yeast)                                   |
| 23321         | TRIM2         | tripartite motif-containing 2                                            |
| 23203         | PMPCA         | peptidase (mitochondrial processing) alpha                               |
| 8031          | NCOA4         | nuclear receptor coactivator 4                                           |
| 26000         | TBC1D10B      | TBC1 domain family, member 10B                                           |
| 29965         | C16orf5       | chromosome 16 open reading frame 5                                       |
| 23351         | KIAA0323      | KIAA0323                                                                 |
| 7738          | ZNF184        | zinc finger protein 184                                                  |
| 4704          | NDUFA9        | NADH dehydrogenase (ubiquinone) 1 alpha subcomplex, 9, 39kDa             |
| 26509         | FER1L3        | fer-1-like 3, myoferlin ( <i>C. elegans</i> )                            |
| 56957         | OTUD7B        | OTU domain containing 7B                                                 |
| 9079          | LDB2          | LIM domain binding 2                                                     |
| 160760        | PPTC7         | PTC7 protein phosphatase homolog ( <i>S. cerevisiae</i> )                |
| 3791          | KDR           | kinase insert domain receptor (a type III receptor tyrosine kinase)      |
| 23048         | FNBP1         | formin binding protein 1                                                 |
| 23048         | FNBP1         | formin binding protein 1                                                 |
| 51187         | C15orf15      | chromosome 15 open reading frame 15                                      |
| 7922          | SLC39A7       | solute carrier family 39 (zinc transporter), member 7                    |
| 54482         | CCDC76        | coiled-coil domain containing 76                                         |
| 1852          | DUSP9         | dual specificity phosphatase 9                                           |
| 56474         | CTPS2         | CTP synthase II                                                          |
| 55777         | MBD5          | methyl-CpG binding domain protein 5                                      |
| 23451         | SF3B1         | splicing factor 3b, subunit 1, 155kDa                                    |
| 51061         | TXNDC11       | thioredoxin domain containing 11                                         |
| 23225         | NUP210        | nucleoporin 210kDa                                                       |
| 29997         | GLTSCR2       | glioma tumor suppressor candidate region gene 2                          |
| 6397          | SEC14L1       | SEC14-like 1 ( <i>S. cerevisiae</i> )                                    |
| 84928         | FLJ14803      | hypothetical protein FLJ14803                                            |
| 54894         | RNF43         | ring finger protein 43                                                   |
| 1475          | CSTA          | cystatin A (stefin A)                                                    |
| 9806          | SPOCK2        | sparc/osteonectin, cwcv and kazal-like domains proteoglycan (testican) 2 |
| 55577         | NAGK          | N-acetylglucosamine kinase                                               |
| 79157         | ET            | hypothetical protein ET                                                  |
| 23586         | DDX58         | DEAD (Asp-Glu-Ala-Asp) box polypeptide 58                                |

|        |          |                                                                                                   |
|--------|----------|---------------------------------------------------------------------------------------------------|
| 8666   | EIF3S4   | eukaryotic translation initiation factor 3, subunit 4 delta, 44kDa                                |
| 114112 | TXNRD3   | thioredoxin reductase 3                                                                           |
| 4640   | MYO1A    | myosin IA                                                                                         |
| 8880   | FUBP1    | far upstream element (FUSE) binding protein 1                                                     |
| 6574   | SLC20A1  | solute carrier family 20 (phosphate transporter), member 1                                        |
| 1456   | CSNK1G3  | casein kinase 1, gamma 3                                                                          |
| 79053  | ALG8     | asparagine-linked glycosylation 8 homolog ( <i>S. cerevisiae</i> , alpha-1,3-glucosyltransferase) |
| 10483  | SEC23B   | Sec23 homolog B ( <i>S. cerevisiae</i> )                                                          |
| 4259   | MGST3    | microsomal glutathione S-transferase 3                                                            |
| 317762 | C14orf65 | chromosome 14 open reading frame 65                                                               |
| 5599   | MAPK8    | mitogen-activated protein kinase 8                                                                |
| 55501  | CHST12   | carbohydrate (chondroitin 4) sulfotransferase 12                                                  |
| 6004   | RGS16    | regulator of G-protein signalling 16                                                              |
| 9400   | RECQL5   | RecQ protein-like 5                                                                               |
| 9055   | PRC1     | protein regulator of cytokinesis 1                                                                |
| 22948  | CCT5     | chaperonin containing TCP1, subunit 5 (epsilon)                                                   |
| 10081  | PDCD7    | programmed cell death 7                                                                           |
| 6853   | SYN1     | synapsin I                                                                                        |
| 5097   | PCDH1    | protocadherin 1 (cadherin-like 1)                                                                 |
| 64786  | TBC1D15  | TBC1 domain family, member 15                                                                     |
| 2060   | EPS15    | epidermal growth factor receptor pathway substrate 15                                             |
| 57708  | MIER1    | mesoderm induction early response 1 homolog ( <i>Xenopus laevis</i> )                             |
| 8452   | CUL3     | cullin 3                                                                                          |
| 25957  | C6orf111 | chromosome 6 open reading frame 111                                                               |
| 354    | KLK3     | kallikrein-related peptidase 3                                                                    |
| 4817   | NIT1     | nitrilase 1                                                                                       |
| 79017  | C7orf24  | chromosome 7 open reading frame 24                                                                |
| 143282 | C10orf13 | chromosome 10 open reading frame 13                                                               |
| 7402   | UTRN     | utrophin (homologous to dystrophin)                                                               |
| 23059  | CLUAP1   | clusterin associated protein 1                                                                    |
| 57701  | KIAA1602 | KIAA1602                                                                                          |
| 93621  | MRFAP1   | Mof4 family associated protein 1                                                                  |
| 3454   | IFNAR1   | interferon (alpha, beta and omega) receptor 1                                                     |
| 51116  | MRPS2    | mitochondrial ribosomal protein S2                                                                |
| 60559  | SPCS3    | signal peptidase complex subunit 3 homolog ( <i>S. cerevisiae</i> )                               |
| 7353   | UFD1L    | ubiquitin fusion degradation 1 like (yeast)                                                       |
| 5066   | PAM      | peptidylglycine alpha-amidating monooxygenase                                                     |

|        |               |                                                                                                   |
|--------|---------------|---------------------------------------------------------------------------------------------------|
| 9925   | ZBTB5         | zinc finger and BTB domain containing 5                                                           |
| 4915   | NTRK2         | neurotrophic tyrosine kinase, receptor, type 2                                                    |
| 847    | CAT           | catalase                                                                                          |
| 2982   | GUCY1A3       | guanylate cyclase 1, soluble, alpha 3                                                             |
| 5997   | RGS2          | regulator of G-protein signalling 2, 24kDa                                                        |
| 348235 | FAM33A        | family with sequence similarity 33, member A                                                      |
| 10133  | OPTN          | optineurin                                                                                        |
| 6596   | SMARCA3       | SWI/SNF related, matrix associated, actin dependent regulator of chromatin, subfamily a, member 3 |
| 51411  | BIN2          | bridging integrator 2                                                                             |
| 80325  | ABTB1         | ankyrin repeat and BTB (POZ) domain containing 1                                                  |
| 80119  | C15orf20      | chromosome 15 open reading frame 20                                                               |
| 5905   | RANGAP1       | Ran GTPase activating protein 1                                                                   |
| 30836  | DNTTIP2       | deoxynucleotidyltransferase, terminal, interacting protein 2                                      |
| 6638   | SNRPN         | small nuclear ribonucleoprotein polypeptide N                                                     |
| 813    | CALU          | calumenin                                                                                         |
| 64375  | IKZF4         | IKAROS family zinc finger 4 (Eos)                                                                 |
| 25875  | LETMD1        | LETM1 domain containing 1                                                                         |
| 54825  | PCLKC         | protocadherin LKC                                                                                 |
| 6249   | RSN           | restin (Reed-Steinberg cell-expressed intermediate filament-associated protein)                   |
| 54716  | SLC6A20       | solute carrier family 6 (proline IMINO transporter), member 20                                    |
| 91156  | DKFZp434B1231 | eEF1A2 binding protein                                                                            |
| 9246   | UBE2L6        | ubiquitin-conjugating enzyme E2L 6                                                                |
| 54462  | KIAA1128      | KIAA1128                                                                                          |
| 10539  | TXNL2         | thioredoxin-like 2                                                                                |
| 23150  | FRMD4B        | FERM domain containing 4B                                                                         |
| 9933   | KIAA0020      | KIAA0020                                                                                          |
| 7257   | TSNAX         | translin-associated factor X                                                                      |
| 7187   | TRAF3         | TNF receptor-associated factor 3                                                                  |
| 57118  | CAMK1D        | calcium/calmodulin-dependent protein kinase ID                                                    |
| 1479   | CSTF3         | cleavage stimulation factor, 3' pre-RNA, subunit 3, 77kDa                                         |
| 23034  | SAMD4A        | sterile alpha motif domain containing 4A                                                          |
| 9639   | ARHGEF10      | Rho guanine nucleotide exchange factor (GEF) 10                                                   |
| 84246  | MED10         | mediator of RNA polymerase II transcription, subunit 10 homolog (NUT2, S. cerevisiae)             |

|        |         |                                                                    |
|--------|---------|--------------------------------------------------------------------|
| 3689   | ITGB2   | integrin, beta 2 (complement component 3 receptor 3 and 4 subunit) |
| 65005  | MRPL9   | mitochondrial ribosomal protein L9                                 |
| 79758  | DHRS12  | dehydrogenase/reductase (SDR family) member 12                     |
| 5630   | PRPH    | peripherin                                                         |
| 80271  | ITPKC   | inositol 1,4,5-trisphosphate 3-kinase C                            |
| 246243 | RNASEH1 | ribonuclease H1                                                    |
| 5046   | PCSK6   | proprotein convertase subtilisin/kexin type 6                      |
| 6286   | S100P   | S100 calcium binding protein P                                     |
| 50717  | WDR42A  | WD repeat domain 42A                                               |
| 10439  | OLFM1   | olfactomedin 1                                                     |
| 10439  | OLFM1   | olfactomedin 1                                                     |
| 55315  | SLC29A3 | solute carrier family 29 (nucleoside transporters), member 3       |
| 83986  | ITFG3   | integrin alpha FG-GAP repeat containing 3                          |
| 23478  | SEC11L1 | SEC11-like 1 ( <i>S. cerevisiae</i> )                              |
| 171024 | SYNPO2  | synaptopodin 2                                                     |
| 120863 | DEPDC4  | DEP domain containing 4                                            |
| 6464   | SHC1    | SHC (Src homology 2 domain containing) transforming protein 1      |
| 80790  | CMIP    | c-Maf-inducing protein                                             |
| 10982  | MAPRE2  | microtubule-associated protein, RP/EB family, member 2             |
| 399687 | MYO18A  | myosin XVIIIa                                                      |
| 2041   | EPHA1   | EPH receptor A1                                                    |
| 56852  | RAD18   | RAD18 homolog ( <i>S. cerevisiae</i> )                             |
| 6146   | RPL22   | ribosomal protein L22                                              |
| 3909   | LAMA3   | laminin, alpha 3                                                   |
| 84173  | RBED1   | RNA binding motif and ELMO/CED-12 domain 1                         |
| 7920   | BAT5    | HLA-B associated transcript 5                                      |
| 56886  | UGCGL1  | UDP-glucose ceramide glucosyltransferase-like 1                    |
| 25983  | NGDN    | neuroguidin, EIF4E binding protein                                 |
| 8727   | CTNNAL1 | catenin (cadherin-associated protein), alpha-like 1                |
| 2530   | FUT8    | fucosyltransferase 8 (alpha (1,6) fucosyltransferase)              |
| 79573  | TTC13   | tetratricopeptide repeat domain 13                                 |
| 1843   | DUSP1   | dual specificity phosphatase 1                                     |
| 26011  | ODZ4    | odz, odd Oz/ten-m homolog 4 ( <i>Drosophila</i> )                  |
| 8829   | NRP1    | neuropilin 1                                                       |
| 64333  | ARHGAP9 | Rho GTPase activating protein 9                                    |
| 9518   | GDF15   | growth differentiation factor 15                                   |
| 10557  | RPP38   | ribonuclease P/MRP 38kDa subunit                                   |
| 57455  | REXO1   | REX1, RNA exonuclease 1 homolog ( <i>S. cerevisiae</i> )           |

|        |           |                                                                                                                                       |
|--------|-----------|---------------------------------------------------------------------------------------------------------------------------------------|
| 339287 | LOC339287 | hypothetical protein LOC339287                                                                                                        |
| 9073   | CLDN8     | claudin 8                                                                                                                             |
| 28512  | NKIRAS1   | NFKB inhibitor interacting Ras-like 1                                                                                                 |
| 54432  | YIPF1     | Yip1 domain family, member 1                                                                                                          |
| 84135  | UTP15     | UTP15, U3 small nucleolar ribonucleoprotein, homolog (S. cerevisiae)                                                                  |
| 51110  | LACTB2    | lactamase, beta 2                                                                                                                     |
| 57605  | PITPNM2   | phosphatidylinositol transfer protein, membrane-associated 2                                                                          |
| 3030   | HADHA     | hydroxyacyl-Coenzyme A dehydrogenase/3-ketoacyl-Coenzyme A thiolase/enoyl-Coenzyme A hydratase (trifunctional protein), alpha subunit |
| 9563   | H6PD      | hexose-6-phosphate dehydrogenase (glucose 1-dehydrogenase)                                                                            |
| 23316  | CUTL2     | cut-like 2 (Drosophila)                                                                                                               |
| 8987   | GENX-3414 | genethonin 1                                                                                                                          |
| 8609   | KLF7      | Kruppel-like factor 7 (ubiquitous)                                                                                                    |
| 11164  | NUDT5     | nudix (nucleoside diphosphate linked moiety X)-type motif 5                                                                           |
| 10560  | SLC19A2   | solute carrier family 19 (thiamine transporter), member 2                                                                             |
| 79084  | WDR77     | WD repeat domain 77                                                                                                                   |
| 8541   | PPFIA3    | protein tyrosine phosphatase, receptor type, f polypeptide (PTPRF), interacting protein (liprin), alpha 3                             |
| 10324  | KBTBD10   | kelch repeat and BTB (POZ) domain containing 10                                                                                       |
| 7840   | ALMS1     | Alstrom syndrome 1                                                                                                                    |
| 25831  | HECTD1    | HECT domain containing 1                                                                                                              |
| 833    | CARS      | cysteinyl-tRNA synthetase                                                                                                             |
| 58487  | ZF        | HCF-binding transcription factor Zhangfei                                                                                             |
| 9712   | USP6NL    | USP6 N-terminal like                                                                                                                  |
| 26156  | RSL1D1    | ribosomal L1 domain containing 1                                                                                                      |
| 55769  | ZNF83     | zinc finger protein 83                                                                                                                |
| 25903  | OLFML2B   | olfactomedin-like 2B                                                                                                                  |
| 6553   | SLC9A5    | solute carrier family 9 (sodium/hydrogen exchanger), member 5                                                                         |
| 2824   | GPM6B     | glycoprotein M6B                                                                                                                      |
| 5264   | PHYH      | phytanoyl-CoA 2-hydroxylase                                                                                                           |
| 10418  | SPON1     | spondin 1, extracellular matrix protein                                                                                               |
| 23081  | JMJD2C    | jumonji domain containing 2C                                                                                                          |
| 56882  | CDC42SE1  | CDC42 small effector 1                                                                                                                |
| 644    | BLVRA     | biliverdin reductase A                                                                                                                |
| 9486   | CHST10    | carbohydrate sulfotransferase 10                                                                                                      |
| 10762  | NUP50     | nucleoporin 50kDa                                                                                                                     |
| 11221  | DUSP10    | dual specificity phosphatase 10                                                                                                       |

|        |          |                                                                                             |
|--------|----------|---------------------------------------------------------------------------------------------|
| 1731   | SEPT1    | septin 1                                                                                    |
| 50489  | CD207    | CD207 molecule, langerin                                                                    |
| 30827  | CXXC1    | CXXC finger 1 (PHD domain)                                                                  |
| 8463   | TEAD2    | TEA domain family member 2                                                                  |
| 7038   | TG       | thyroglobulin                                                                               |
| 5034   | P4HB     | procollagen-proline, 2-oxoglutarate 4-dioxygenase (proline 4-hydroxylase), beta polypeptide |
| 266812 | NAP1L5   | nucleosome assembly protein 1-like 5                                                        |
| 6014   | RIT2     | Ras-like without CAAX 2                                                                     |
| 3291   | HSD11B2  | hydroxysteroid (11-beta) dehydrogenase 2                                                    |
| 827    | CAPN6    | calpain 6                                                                                   |
| 1837   | DTNA     | dystrobrevin, alpha                                                                         |
| 9223   | MAGI1    | membrane associated guanylate kinase, WW and PDZ domain containing 1                        |
| 10464  | C13orf24 | chromosome 13 open reading frame 24                                                         |
| 285704 | RGMB     | RGM domain family, member B                                                                 |
| 5993   | RFX5     | regulatory factor X, 5 (influences HLA class II expression)                                 |
| 64376  | IKZF5    | IKAROS family zinc finger 5 (Pegasus)                                                       |
| 3710   | ITPR3    | inositol 1,4,5-triphosphate receptor, type 3                                                |
| 85450  | KIAA1754 | KIAA1754                                                                                    |
| 10213  | PSMD14   | proteasome (prosome, macropain) 26S subunit, non-ATPase, 14                                 |
| 3553   | IL1B     | interleukin 1, beta                                                                         |
| 5684   | PSMA3    | proteasome (prosome, macropain) subunit, alpha type, 3                                      |
| 6738   | TROVE2   | TROVE domain family, member 2                                                               |
| 25847  | ANAPC13  | anaphase promoting complex subunit 13                                                       |
| 5074   | PAWR     | PRKC, apoptosis, WT1, regulator                                                             |
| 9580   | SOX13    | SRY (sex determining region Y)-box 13                                                       |
| 150572 | SMYD1    | SET and MYND domain containing 1                                                            |
| 23061  | TBC1D9B  | TBC1 domain family, member 9B (with GRAM domain)                                            |
| 79188  | TMEM43   | transmembrane protein 43                                                                    |
| 51430  | C1orf9   | chromosome 1 open reading frame 9                                                           |
| 23348  | DOCK9    | dedicator of cytokinesis 9                                                                  |
| 11164  | NUDT5    | nudix (nucleoside diphosphate linked moiety X)-type motif 5                                 |
| 23288  | IQCE     | IQ motif containing E                                                                       |
| 123    | ADFP     | adipose differentiation-related protein                                                     |
| 1827   | DSCR1    | Down syndrome critical region gene 1                                                        |
| 6732   | SRPK1    | SFRS protein kinase 1                                                                       |
| 3219   | HOXB9    | homeobox B9                                                                                 |
| 60412  | EXOC4    | exocyst complex component 4                                                                 |
| 57680  | CHD8     | chromodomain helicase DNA binding protein 8                                                 |

|        |           |                                                                                    |
|--------|-----------|------------------------------------------------------------------------------------|
| 22802  | CLCA4     | chloride channel, calcium activated, family member 4                               |
| 27248  | C2orf30   | chromosome 2 open reading frame 30                                                 |
| 54987  | C1orf123  | chromosome 1 open reading frame 123                                                |
| 49855  | ZNF291    | zinc finger protein 291                                                            |
| 80209  | C13orf23  | chromosome 13 open reading frame 23                                                |
| 26224  | FBXL3     | F-box and leucine-rich repeat protein 3                                            |
| 27243  | CHMP2A    | chromatin modifying protein 2A                                                     |
| 10745  | PHTF1     | putative homeodomain transcription factor 1                                        |
| 4435   | CITED1    | Cbp/p300-interacting transactivator, with Glu/Asp-rich carboxy-terminal domain, 1  |
| 1880   | EBI2      | Epstein-Barr virus induced gene 2 (lymphocyte-specific G protein-coupled receptor) |
| 26504  | CNNM4     | cyclin M4                                                                          |
| 2125   | EVPL      | envoplakin                                                                         |
| 6422   | SFRP1     | secreted frizzled-related protein 1                                                |
| 127544 | IBRDC3    | IBR domain containing 3                                                            |
| 7071   | KLF10     | Kruppel-like factor 10                                                             |
| 5469   | PPARBP    | PPAR binding protein                                                               |
| 51703  | ACSL5     | acyl-CoA synthetase long-chain family member 5                                     |
| 57657  | HCN3      | hyperpolarization activated cyclic nucleotide-gated potassium channel 3            |
| 3939   | LDHA      | lactate dehydrogenase A                                                            |
| 57482  | KIAA1211  | KIAA1211 protein                                                                   |
| 114882 | OSBPL8    | oxysterol binding protein-like 8                                                   |
| 339287 | LOC339287 | hypothetical protein LOC339287                                                     |
| 55520  | ELAC1     | elaC homolog 1 (E. coli)                                                           |
| 64115  | C10orf54  | chromosome 10 open reading frame 54                                                |
| 408    | ARRB1     | arrestin, beta 1                                                                   |
| 93624  | MGC21874  | transcriptional adaptor 2 (ADA2 homolog, yeast)-beta                               |
| 23670  | TMEM2     | transmembrane protein 2                                                            |
| 11178  | LZTS1     | leucine zipper, putative tumor suppressor 1                                        |
| 221322 | C6orf170  | chromosome 6 open reading frame 170                                                |
| 203054 | ADCK5     | aarF domain containing kinase 5                                                    |
| 10915  | TCERG1    | transcription elongation regulator 1                                               |
| 7175   | TPR       | translocated promoter region (to activated MET oncogene)                           |
| 23154  | NCDN      | neurochondrin                                                                      |
| 2631   | GBAS      | glioblastoma amplified sequence                                                    |
| 2078   | ERG       | v-ets erythroblastosis virus E26 oncogene homolog (avian)                          |
| 150465 | TTL       | tubulin tyrosine ligase                                                            |
| 84318  | CCDC77    | coiled-coil domain containing 77                                                   |
| 56254  | RNF20     | ring finger protein 20                                                             |
| 23095  | KIF1B     | kinesin family member 1B                                                           |

|       |          |                                                                                                |
|-------|----------|------------------------------------------------------------------------------------------------|
| 23275 | POFUT2   | protein O-fucosyltransferase 2                                                                 |
| 9650  | MTFR1    | mitochondrial fission regulator 1                                                              |
| 79767 | ELMO3    | engulfment and cell motility 3                                                                 |
| 6901  | TAZ      | tafazzin (cardiomyopathy, dilated 3A (X-linked); endocardial fibroelastosis 2; Barth syndrome) |
| 57535 | KIAA1324 | KIAA1324                                                                                       |
| 94056 | SYAP1    | synapse associated protein 1, SAP47 homolog (Drosophila)                                       |
| 471   | ATIC     | 5-aminoimidazole-4-carboxamide ribonucleotide formyltransferase/IMP cyclohydrolase             |
| 57464 | FAM40B   | family with sequence similarity 40, member B                                                   |
| 60625 | DHX35    | DEAH (Asp-Glu-Ala-His) box polypeptide 35                                                      |
| 966   | CD59     | CD59 molecule, complement regulatory protein                                                   |
| 2828  | GPR4     | G protein-coupled receptor 4                                                                   |
| 1386  | ATF2     | activating transcription factor 2                                                              |
| 6813  | STXBP2   | syntaxin binding protein 2                                                                     |
| 1994  | ELAVL1   | ELAV (embryonic lethal, abnormal vision, Drosophila)-like 1 (Hu antigen R)                     |
| 6484  | ST3GAL4  | ST3 beta-galactoside alpha-2,3-sialyltransferase 4                                             |
| 6122  | RPL3     | ribosomal protein L3                                                                           |
| 10902 | BRD8     | bromodomain containing 8                                                                       |
| 27018 | NGFRAP1  | nerve growth factor receptor (TNFRSF16) associated protein 1                                   |
| 34    | ACADM    | acyl-Coenzyme A dehydrogenase, C-4 to C-12 straight chain                                      |
| 7570  | ZNF22    | zinc finger protein 22 (KOX 15)                                                                |
| 57685 | CACHD1   | cache domain containing 1                                                                      |
| 81567 | TXNDC5   | thioredoxin domain containing 5                                                                |
| 8676  | STX11    | syntaxin 11                                                                                    |
| 4292  | MLH1     | mutL homolog 1, colon cancer, nonpolyposis type 2 (E. coli)                                    |
| 10252 | SPRY1    | sprouty homolog 1, antagonist of FGF signaling (Drosophila)                                    |
| 9404  | LPXN     | leupaxin                                                                                       |
| 10048 | RANBP9   | RAN binding protein 9                                                                          |
| 27352 | RUTBC3   | RUN and TBC1 domain containing 3                                                               |
| 9673  | SLC25A44 | solute carrier family 25, member 44                                                            |
| 23277 | KIAA0664 | KIAA0664                                                                                       |
| 5051  | PAFAH2   | platelet-activating factor acetylhydrolase 2, 40kDa                                            |
| 2870  | GRK6     | G protein-coupled receptor kinase 6                                                            |
| 55314 | TMEM144  | transmembrane protein 144                                                                      |
| 10714 | POLD3    | polymerase (DNA-directed), delta 3, accessory subunit                                          |



|        |          |                                                                                  |
|--------|----------|----------------------------------------------------------------------------------|
| 79009  | DDX50    | DEAD (Asp-Glu-Ala-Asp) box polypeptide 50                                        |
| 718    | C3       | complement component 3                                                           |
| 9725   | TMEM63A  | transmembrane protein 63A                                                        |
| 80144  | FRAS1    | Fraser syndrome 1                                                                |
| 10947  | AP3M2    | adaptor-related protein complex 3, mu 2 subunit                                  |
| 51727  | CMPK     | cytidylate kinase                                                                |
| 54940  | OCIAD1   | OCIA domain containing 1                                                         |
| 50507  | NOX4     | NADPH oxidase 4                                                                  |
| 5002   | SLC22A18 | solute carrier family 22 (organic cation transporter), member 18                 |
| 23122  | CLASP2   | cytoplasmic linker associated protein 2                                          |
| 5627   | PROS1    | protein S (alpha)                                                                |
| 5204   | PFDN5    | prefoldin subunit 5                                                              |
| 57216  | VANGL2   | vang-like 2 (van gogh, Drosophila)                                               |
| 9919   | KIAA0310 | KIAA0310                                                                         |
| 23085  | ERC1     | ELKS/RAB6-interacting/CAST family member 1                                       |
| 58155  | PTBP2    | polypyrimidine tract binding protein 2                                           |
| 4140   | MARK3    | MAP/microtubule affinity-regulating kinase 3                                     |
| 220972 | MARCH8   | membrane-associated ring finger (C3HC4) 8                                        |
| 9899   | SV2B     | synaptic vesicle glycoprotein 2B                                                 |
| 8809   | IL18R1   | interleukin 18 receptor 1                                                        |
| 9698   | PUM1     | pumilio homolog 1 (Drosophila)                                                   |
| 54454  | KIAA1240 | KIAA1240 protein                                                                 |
| 80700  | UBXD1    | UBX domain containing 1                                                          |
| 4739   | NEDD9    | neural precursor cell expressed, developmentally down-regulated 9                |
| 4145   | MATK     | megakaryocyte-associated tyrosine kinase                                         |
| 26052  | DNM3     | dynamamin 3                                                                      |
| 7559   | ZNF12    | zinc finger protein 12                                                           |
| 5522   | PPP2R2C  | protein phosphatase 2 (formerly 2A), regulatory subunit B (PR 52), gamma isoform |
| 4054   | LTBP3    | latent transforming growth factor beta binding protein 3                         |
| 4664   | NAB1     | NGFI-A binding protein 1 (EGR1 binding protein 1)                                |
| 64856  | VWA1     | von Willebrand factor A domain containing 1                                      |
| 50848  | F11R     | F11 receptor                                                                     |
| 84254  | CAMKK1   | calcium/calmodulin-dependent protein kinase kinase 1, alpha                      |
| 64342  | HS1BP3   | HCLS1 binding protein 3                                                          |
| 6941   | TCF19    | transcription factor 19 (SC1)                                                    |
| 55510  | DDX43    | DEAD (Asp-Glu-Ala-Asp) box polypeptide 43                                        |

|        |         |                                                                                                                              |
|--------|---------|------------------------------------------------------------------------------------------------------------------------------|
| 27065  | D4S234E | DNA segment on chromosome 4 (unique)<br>234 expressed sequence                                                               |
| 1749   | DLX5    | distal-less homeobox 5                                                                                                       |
| 10492  | SYNCRIP | synaptotagmin binding, cytoplasmic RNA<br>interacting protein                                                                |
| 51808  | RNUXA   | RNA U, small nuclear RNA export<br>adaptor (phosphorylation regulated)                                                       |
| 4045   | LSAMP   | limbic system-associated membrane<br>protein                                                                                 |
| 55677  | IWS1    | IWS1 homolog (S. cerevisiae)                                                                                                 |
| 3182   | HNRPAB  | heterogeneous nuclear ribonucleoprotein<br>A/B                                                                               |
| 23515  | MORC3   | MORC family CW-type zinc finger 3<br>splicing factor proline/glutamine-rich                                                  |
| 6421   | SFPQ    | (polypyrimidine tract binding protein<br>associated)                                                                         |
| 6770   | STAR    | steroidogenic acute regulator                                                                                                |
| 80824  | DUSP16  | dual specificity phosphatase 16                                                                                              |
| 53615  | MBD3    | methyl-CpG binding domain protein 3                                                                                          |
| 54881  | TEX10   | testis expressed sequence 10                                                                                                 |
| 10494  | STK25   | serine/threonine kinase 25 (STE20<br>homolog, yeast)                                                                         |
| 10755  | GIPC1   | GIPC PDZ domain containing family,<br>member 1                                                                               |
| 1439   | CSF2RB  | colony stimulating factor 2 receptor, beta,<br>low-affinity (granulocyte-macrophage)                                         |
| 10237  | SLC35B1 | solute carrier family 35, member B1                                                                                          |
| 158399 | ZNF483  | zinc finger protein 483                                                                                                      |
| 9093   | DNAJA3  | DnaJ (Hsp40) homolog, subfamily A,<br>member 3                                                                               |
| 3836   | KPNA1   | karyopherin alpha 1 (importin alpha 5)                                                                                       |
| 7039   | TGFA    | transforming growth factor, alpha                                                                                            |
| 7039   | TGFA    | transforming growth factor, alpha                                                                                            |
| 65010  | SLC26A6 | solute carrier family 26, member 6                                                                                           |
| 389    | RHOC    | ras homolog gene family, member C                                                                                            |
| 10286  | BCAS2   | breast carcinoma amplified sequence 2<br>pleckstrin homology domain containing,<br>family G (with RhoGef domain) member<br>2 |
| 64857  | PLEKHG2 | pleckstrin homology domain containing,<br>family G (with RhoGef domain) member<br>2                                          |
| 3678   | ITGA5   | integrin, alpha 5 (fibronectin receptor,<br>alpha polypeptide)                                                               |
| 159    | ADSS    | adenylosuccinate synthase                                                                                                    |
| 4688   | NCF2    | neutrophil cytosolic factor 2 (65kDa,<br>chronic granulomatous disease,<br>autosomal 2)                                      |
| 64708  | COPS7B  | COP9 constitutive photomorphogenic<br>homolog subunit 7B (Arabidopsis)                                                       |
| 199692 | ZNF627  | zinc finger protein 627                                                                                                      |
| 23301  | EHBP1   | EH domain binding protein 1                                                                                                  |

|        |          |                                                                                                    |
|--------|----------|----------------------------------------------------------------------------------------------------|
| 3081   | HGD      | homogentisate 1,2-dioxygenase (homogentisate oxidase)                                              |
| 1910   | EDNRB    | endothelin receptor type B                                                                         |
| 54622  | ARL15    | ADP-ribosylation factor-like 15                                                                    |
| 7373   | COL14A1  | collagen, type XIV, alpha 1 (undulin)                                                              |
| 57488  | FAM62B   | family with sequence similarity 62 (C2 domain containing) member B                                 |
| 9950   | GOLGA5   | golgi autoantigen, golgin subfamily a, 5                                                           |
| 55075  | UACA     | uveal autoantigen with coiled-coil domains and ankyrin repeats                                     |
| 6125   | RPL5     | ribosomal protein L5                                                                               |
| 1594   | CYP27B1  | cytochrome P450, family 27, subfamily B, polypeptide 1                                             |
| 221178 | SPATA13  | spermatogenesis associated 13                                                                      |
| 84823  | LMNB2    | lamin B2                                                                                           |
| 23552  | CCRK     | cell cycle related kinase                                                                          |
| 2354   | FOSB     | FBJ murine osteosarcoma viral oncogene homolog B                                                   |
| 9669   | EIF5B    | eukaryotic translation initiation factor 5B                                                        |
| 9063   | PIAS2    | protein inhibitor of activated STAT, 2                                                             |
| 1956   | EGFR     | epidermal growth factor receptor (erythroblastic leukemia viral (v-erb-b) oncogene homolog, avian) |
| 26128  | KIAA1279 | KIAA1279                                                                                           |
| 10131  | TRAP1    | TNF receptor-associated protein 1                                                                  |
| 50717  | WDR42A   | WD repeat domain 42A                                                                               |
| 55589  | BMP2K    | BMP2 inducible kinase                                                                              |
| 9927   | MFN2     | mitofusin 2                                                                                        |
| 9927   | MFN2     | mitofusin 2                                                                                        |
| 8218   | CLTCL1   | clathrin, heavy chain-like 1                                                                       |
| 8218   | CLTCL1   | clathrin, heavy chain-like 1                                                                       |
| 6242   | RTKN     | rhotekin                                                                                           |
| 10422  | UBADC1   | ubiquitin associated domain containing 1                                                           |
| 7572   | ZNF24    | zinc finger protein 24                                                                             |
| 22837  | COBLL1   | COBL-like 1                                                                                        |
| 9453   | GGPS1    | geranylgeranyl diphosphate synthase 1                                                              |
| 6326   | SCN2A2   | sodium channel, voltage-gated, type II, alpha 2                                                    |
| 4312   | MMP1     | matrix metalloproteinase 1 (interstitial collagenase)                                              |
| 10664  | CTCF     | CCCTC-binding factor (zinc finger protein)                                                         |
| 8910   | SGCE     | sarcoglycan, epsilon                                                                               |
| 10121  | ACTR1A   | ARP1 actin-related protein 1 homolog A, capping protein alpha (yeast)                              |
| 84900  | TMEM118  | transmembrane protein 118                                                                          |
| 57460  | PPM1H    | protein phosphatase 1H (PP2C domain containing)                                                    |
| 6671   | SP4      | Sp4 transcription factor                                                                           |

|        |           |                                                                              |
|--------|-----------|------------------------------------------------------------------------------|
| 9765   | ZFYVE16   | zinc finger, FYVE domain containing 16                                       |
| 79656  | C1orf165  | chromosome 1 open reading frame 165                                          |
| 50488  | MINK1     | misshapen-like kinase 1 (zebrafish)                                          |
| 57826  | RAP2C     | RAP2C, member of RAS oncogene family                                         |
| 23412  | COMMD3    | COMM domain containing 3                                                     |
| 3632   | INPP5A    | inositol polyphosphate-5-phosphatase, 40kDa                                  |
| 23213  | SULF1     | sulfatase 1                                                                  |
| 5571   | PRKAG1    | protein kinase, AMP-activated, gamma 1 non-catalytic subunit                 |
| 5653   | KLK6      | kallikrein-related peptidase 6                                               |
| 1192   | CLIC1     | chloride intracellular channel 1                                             |
| 51582  | AZIN1     | antizyme inhibitor 1                                                         |
| 171023 | ASXL1     | additional sex combs like 1 (Drosophila)                                     |
| 5495   | PPM1B     | protein phosphatase 1B (formerly 2C), magnesium-dependent, beta isoform      |
| 55917  | CTTNBP2NL | CTTNBP2 N-terminal like                                                      |
| 55917  | CTTNBP2NL | CTTNBP2 N-terminal like                                                      |
| 9732   | DOCK4     | dedicator of cytokinesis 4                                                   |
| 25938  | C14orf125 | chromosome 14 open reading frame 125                                         |
| 8895   | CPNE3     | copine III                                                                   |
| 57700  | KIAA1600  | KIAA1600                                                                     |
| 114881 | OSBPL7    | oxysterol binding protein-like 7                                             |
| 64122  | FN3K      | fructosamine 3 kinase                                                        |
| 84186  | ZCCHC7    | zinc finger, CCHC domain containing 7                                        |
| 1374   | CPT1A     | carnitine palmitoyltransferase 1A (liver)                                    |
| 65983  | GRAMD3    | GRAM domain containing 3                                                     |
| 5129   | PCTK3     | PCTAIRE protein kinase 3                                                     |
| 56910  | STARD7    | START domain containing 7                                                    |
| 5864   | RAB3A     | RAB3A, member RAS oncogene family                                            |
| 57549  | IGSF9     | immunoglobulin superfamily, member 9                                         |
| 11067  | C10orf10  | chromosome 10 open reading frame 10                                          |
| 2901   | GRIK5     | glutamate receptor, ionotropic, kainate 5                                    |
| 27340  | UTP20     | UTP20, small subunit (SSU) processome component, homolog (yeast)             |
| 6821   | SUOX      | sulfite oxidase                                                              |
| 10568  | SLC34A2   | solute carrier family 34 (sodium phosphate), member 2                        |
| 112483 | SAT2      | spermidine/spermine N1-acetyltransferase 2                                   |
| 6434   | SFRS10    | splicing factor, arginine/serine-rich 10 (transformer 2 homolog, Drosophila) |
| 4552   | MTRR      | 5-methyltetrahydrofolate-homocysteine methyltransferase reductase            |
| 56995  | TULP4     | tubby like protein 4                                                         |

|        |          |                                                                                |
|--------|----------|--------------------------------------------------------------------------------|
| 6809   | STX3     | syntaxin 3                                                                     |
| 23228  | PLCL2    | phospholipase C-like 2                                                         |
| 8560   | DEGS1    | degenerative spermatocyte homolog 1, lipid desaturase (Drosophila)             |
| 27095  | TRAPPC3  | trafficking protein particle complex 3                                         |
| 25813  | SAMM50   | sorting and assembly machinery component 50 homolog (S. cerevisiae)            |
| 8888   | MCM3AP   | MCM3 minichromosome maintenance deficient 3 (S. cerevisiae) associated protein |
| 4283   | CXCL9    | chemokine (C-X-C motif) ligand 9                                               |
| 92454  | PRR8     | proline rich 8                                                                 |
| 57631  | LRCH2    | leucine-rich repeats and calponin homology (CH) domain containing 2            |
| 60681  | FKBP10   | FK506 binding protein 10, 65 kDa                                               |
| 4199   | ME1      | malic enzyme 1, NADP(+)-dependent, cytosolic                                   |
| 4199   | ME1      | malic enzyme 1, NADP(+)-dependent, cytosolic                                   |
| 8554   | PIAS1    | protein inhibitor of activated STAT, 1                                         |
| 57162  | PELI1    | pellino homolog 1 (Drosophila)                                                 |
| 2113   | ETS1     | v-ets erythroblastosis virus E26 oncogene homolog 1 (avian)                    |
| 51094  | ADIPOR1  | adiponectin receptor 1                                                         |
| 23317  | DNAJC13  | DnaJ (Hsp40) homolog, subfamily C, member 13                                   |
| 579    | BAPX1    | bagpipe homeobox homolog 1 (Drosophila)                                        |
| 404093 | CUEDC1   | CUE domain containing 1                                                        |
| 9980   | DOPEY2   | dopey family member 2                                                          |
| 23007  | PLCH1    | phospholipase C, eta 1                                                         |
| 2686   | GGTL3    | gamma-glutamyltransferase-like 3                                               |
| 83892  | KCTD10   | potassium channel tetramerisation domain containing 10                         |
| 10989  | IMMT     | inner membrane protein, mitochondrial (mitofilin)                              |
| 128    | ADH5     | alcohol dehydrogenase 5 (class III), chi polypeptide                           |
| 7043   | TGFB3    | transforming growth factor, beta 3                                             |
| 2145   | EZH1     | enhancer of zeste homolog 1 (Drosophila)                                       |
| 29123  | ANKRD11  | ankyrin repeat domain 11                                                       |
| 11001  | SLC27A2  | solute carrier family 27 (fatty acid transporter), member 2                    |
| 547    | KIF1A    | kinesin family member 1A                                                       |
| 94241  | TP53INP1 | tumor protein p53 inducible nuclear protein 1                                  |
| 23463  | ICMT     | isoprenylcysteine carboxyl methyltransferase                                   |
| 81555  | YIPF5    | Yip1 domain family, member 5                                                   |
| 79078  | C1orf50  | chromosome 1 open reading frame 50                                             |

|        |           |                                                                                                       |
|--------|-----------|-------------------------------------------------------------------------------------------------------|
| 4839   | NOL1      | nucleolar protein 1, 120kDa                                                                           |
| 7347   | UCHL3     | ubiquitin carboxyl-terminal esterase L3<br>(ubiquitin thiolesterase)                                  |
| 26301  | GBGT1     | globoside alpha-1,3-N-<br>acetylgalactosaminyltransferase 1                                           |
| 1676   | DFFA      | DNA fragmentation factor, 45kDa, alpha<br>polypeptide                                                 |
| 54617  | INOC1     | INO80 complex homolog 1 (S.<br>cerevisiae)                                                            |
| 51673  | CGI-38    | brain specific protein                                                                                |
| 6625   | SNRP70    | small nuclear ribonucleoprotein 70kDa<br>polypeptide (RNP antigen)                                    |
| 64223  | GBL       | G protein beta subunit-like                                                                           |
| 199745 | THAP8     | THAP domain containing 8                                                                              |
| 79876  | UBE1DC1   | ubiquitin-activating enzyme E1-domain<br>containing 1                                                 |
| 4072   | TACSTD1   | tumor-associated calcium signal<br>transducer 1                                                       |
| 11197  | WIF1      | WNT inhibitory factor 1                                                                               |
| 26585  | GREM1     | gremlin 1, cysteine knot superfamily,<br>homolog ( <i>Xenopus laevis</i> )                            |
| 6204   | RPS10     | ribosomal protein S10                                                                                 |
| 4023   | LPL       | lipoprotein lipase                                                                                    |
| 10635  | RAD51AP1  | RAD51 associated protein 1                                                                            |
| 2926   | GRSF1     | G-rich RNA sequence binding factor 1                                                                  |
| 56997  | CABC1     | chaperone, ABC1 activity of bc1 complex<br>homolog ( <i>S. pombe</i> )                                |
| 815    | CAMK2A    | calcium/calmodulin-dependent protein<br>kinase (CaM kinase) II alpha                                  |
| 23366  | KIAA0895  | KIAA0895 protein                                                                                      |
| 10979  | PLEKHC1   | pleckstrin homology domain containing,<br>family C (with FERM domain) member 1                        |
| 1501   | CTNND2    | catenin (cadherin-associated protein),<br>delta 2 (neural plakophilin-related arm-<br>repeat protein) |
| 820    | CAMP      | cathelicidin antimicrobial peptide                                                                    |
| 9727   | RAB11FIP3 | RAB11 family interacting protein 3 (class<br>II)                                                      |
| 55743  | CHFR      | checkpoint with forkhead and ring finger<br>domains                                                   |
| 84437  | KIAA1826  | KIAA1826                                                                                              |
| 1272   | CNTN1     | contactin 1                                                                                           |
| 26115  | TANC2     | tetratricopeptide repeat, ankyrin repeat<br>and coiled-coil containing 2                              |
| 55230  | USP40     | ubiquitin specific peptidase 40                                                                       |
| 23405  | DICER1    | Dicer1, Dcr-1 homolog ( <i>Drosophila</i> )                                                           |
| 1607   | DGKB      | diacylglycerol kinase, beta 90kDa                                                                     |
| 55701  | FLJ10357  | hypothetical protein FLJ10357                                                                         |
| 108    | ADCY2     | adenylate cyclase 2 (brain)                                                                           |
| 5650   | KLK7      | kallikrein-related peptidase 7                                                                        |

|        |           |                                                                                                 |
|--------|-----------|-------------------------------------------------------------------------------------------------|
| 9685   | CLINT1    | clathrin interactor 1                                                                           |
| 152137 | CCDC50    | coiled-coil domain containing 50                                                                |
| 3394   | IRF8      | interferon regulatory factor 8                                                                  |
| 857    | CAV1      | caveolin 1, caveolae protein, 22kDa                                                             |
| 8496   | PPFIBP1   | PTPRF interacting protein, binding protein 1 (liprin beta 1)                                    |
| 4791   | NFKB2     | nuclear factor of kappa light polypeptide gene enhancer in B-cells 2 (p49/p100)                 |
| 25948  | KBTBD2    | kelch repeat and BTB (POZ) domain containing 2                                                  |
| 1153   | CIRBP     | cold inducible RNA binding protein                                                              |
| 2219   | FCN1      | ficolin (collagen/fibrinogen domain containing) 1                                               |
| 1615   | DARS      | aspartyl-tRNA synthetase                                                                        |
| 55624  | POMGNT1   | protein O-linked mannose beta1,2-N-acetylglucosaminyltransferase                                |
| 2057   | EPOR      | erythropoietin receptor                                                                         |
| 23435  | TARDBP    | TAR DNA binding protein                                                                         |
| 23435  | TARDBP    | TAR DNA binding protein                                                                         |
| 7022   | TFAP2C    | transcription factor AP-2 gamma (activating enhancer binding protein 2 gamma)                   |
| 9354   | UBE4A     | ubiquitination factor E4A (UFD2 homolog, yeast)                                                 |
| 2213   | FCGR2B    | Fc fragment of IgG, low affinity IIb, receptor (CD32)                                           |
| 92241  | RCSD1     | RCSD domain containing 1                                                                        |
| 2588   | GALNS     | galactosamine (N-acetyl)-6-sulfate sulfatase (Morquio syndrome, mucopolysaccharidosis type IVA) |
| 10099  | TSPAN3    | tetraspanin 3                                                                                   |
| 60686  | C14orf93  | chromosome 14 open reading frame 93                                                             |
| 4846   | NOS3      | nitric oxide synthase 3 (endothelial cell)                                                      |
| 79086  | C19orf42  | chromosome 19 open reading frame 42                                                             |
| 79802  | KIAA1822L | KIAA1822-like                                                                                   |
| 57553  | MICAL3    | microtubule associated monooxygenase, calponin and LIM domain containing 3                      |
| 9551   | ATP5J2    | ATP synthase, H <sup>+</sup> transporting, mitochondrial F0 complex, subunit F2                 |
| 2934   | GSN       | gelsolin (amyloidosis, Finnish type)                                                            |
| 8939   | FUBP3     | far upstream element (FUSE) binding protein 3                                                   |
| 6405   | SEMA3F    | sema domain, immunoglobulin domain (Ig), short basic domain, secreted, (semaphorin) 3F          |
| 719    | C3AR1     | complement component 3a receptor 1                                                              |
| 55118  | CRTAC1    | cartilage acidic protein 1                                                                      |
| 6608   | SMO       | smoothened homolog (Drosophila)                                                                 |

|        |          |                                                                                         |
|--------|----------|-----------------------------------------------------------------------------------------|
| 9903   | KLHL21   | kelch-like 21 (Drosophila)                                                              |
| 23389  | THRAP2   | thyroid hormone receptor associated protein 2                                           |
| 7533   | YWHAH    | tyrosine 3-monooxygenase/tryptophan 5-monooxygenase activation protein, eta polypeptide |
| 25999  | CLIPR-59 | CLIP-170-related protein                                                                |
| 55224  | ETNK2    | ethanolamine kinase 2                                                                   |
| 400    | ARL1     | ADP-ribosylation factor-like 1                                                          |
| 157247 | MGC27345 | hypothetical protein MGC27345                                                           |
| 54838  | C10orf26 | chromosome 10 open reading frame 26                                                     |
| 10806  | SDCCAG8  | serologically defined colon cancer antigen 8                                            |
| 3667   | IRS1     | insulin receptor substrate 1                                                            |
| 10171  | RCL1     | RNA terminal phosphate cyclase-like 1                                                   |
| 863    | CBFA2T3  | core-binding factor, runt domain, alpha subunit 2; translocated to, 3                   |
| 5338   | PLD2     | phospholipase D2                                                                        |
| 9138   | ARHGEF1  | Rho guanine nucleotide exchange factor (GEF) 1                                          |
| 1213   | CLTC     | clathrin, heavy chain (Hc)                                                              |
| 55215  | KIAA1794 | KIAA1794                                                                                |
| 3658   | IREB2    | iron-responsive element binding protein 2                                               |
| 1908   | EDN3     | endothelin 3                                                                            |
| 81671  | TMEM49   | transmembrane protein 49                                                                |
| 284459 | HKR1     | GLI-Kruppel family member HKR1                                                          |
| 115209 | OMA1     | OMA1 homolog, zinc metallopeptidase ( <i>S. cerevisiae</i> )                            |
| 5184   | PEPD     | peptidase D                                                                             |
| 5935   | RBM3     | RNA binding motif (RNP1, RRM) protein 3                                                 |
| 55081  | IFT57    | intraflagellar transport 57 homolog ( <i>Chlamydomonas</i> )                            |
| 9658   | ZNF516   | zinc finger protein 516                                                                 |
| 1140   | CHRNA1   | cholinergic receptor, nicotinic, beta 1 (muscle)                                        |
| 6453   | ITSN1    | intersectin 1 (SH3 domain protein)                                                      |
| 8559   | PRPF18   | PRP18 pre-mRNA processing factor 18 homolog ( <i>S. cerevisiae</i> )                    |
| 51340  | CRNKL1   | Crn, crooked neck-like 1 ( <i>Drosophila</i> )                                          |
| 6867   | TACC1    | transforming, acidic coiled-coil containing protein 1                                   |
| 7586   | ZKSCAN1  | zinc finger with KRAB and SCAN domains 1                                                |
| 2139   | EYA2     | eyes absent homolog 2 ( <i>Drosophila</i> )                                             |
| 10891  | PPARGC1A | peroxisome proliferator-activated receptor gamma, coactivator 1 alpha                   |
| 8318   | CDC45L   | CDC45 cell division cycle 45-like ( <i>S. cerevisiae</i> )                              |



|        |          |                                                                                                                 |
|--------|----------|-----------------------------------------------------------------------------------------------------------------|
| 8318   | CDC45L   | CDC45 cell division cycle 45-like ( <i>S. cerevisiae</i> )                                                      |
| 29841  | GRHL1    | grainyhead-like 1 ( <i>Drosophila</i> )                                                                         |
| 677    | ZFP36L1  | zinc finger protein 36, C3H type-like 1                                                                         |
| 57606  | SLAIN2   | SLAIN motif family, member 2                                                                                    |
| 51704  | GPRC5B   | G protein-coupled receptor, family C, group 5, member B                                                         |
| 84986  | ARHGAP19 | Rho GTPase activating protein 19                                                                                |
| 6356   | CCL11    | chemokine (C-C motif) ligand 11                                                                                 |
| 201134 | CCDC46   | coiled-coil domain containing 46                                                                                |
| 10797  | MTHFD2   | methylenetetrahydrofolate dehydrogenase (NADP+ dependent) 2, methenyltetrahydrofolate cyclohydrolase            |
| 8027   | STAM     | signal transducing adaptor molecule (SH3 domain and ITAM motif) 1                                               |
| 91419  | XRCC6BP1 | XRCC6 binding protein 1                                                                                         |
| 4846   | NOS3     | nitric oxide synthase 3 (endothelial cell)                                                                      |
| 10914  | PAPOLA   | poly(A) polymerase alpha                                                                                        |
| 51093  | C1orf66  | chromosome 1 open reading frame 66                                                                              |
| 3655   | ITGA6    | integrin, alpha 6                                                                                               |
| 1382   | CRABP2   | cellular retinoic acid binding protein 2                                                                        |
| 2214   | FCGR3A   | Fc fragment of IgG, low affinity IIIa, receptor (CD16a)                                                         |
| 11218  | DDX20    | DEAD (Asp-Glu-Ala-Asp) box polypeptide 20                                                                       |
| 81563  | C1orf21  | chromosome 1 open reading frame 21                                                                              |
| 6641   | SNTB1    | syntrophin, beta 1 (dystrophin-associated protein A1, 59kDa, basic component 1)                                 |
| 55716  | LMBR1L   | limb region 1 homolog (mouse)-like                                                                              |
| 9044   | BTA1F1   | BTA1F1 RNA polymerase II, B-TFIID transcription factor-associated, 170kDa (Mot1 homolog, <i>S. cerevisiae</i> ) |
| 5033   | P4HA1    | procollagen-proline, 2-oxoglutarate 4-dioxygenase (proline 4-hydroxylase), alpha polypeptide I                  |
| 51155  | HN1      | hematological and neurological expressed 1                                                                      |
| 146923 | RUNDC1   | RUN domain containing 1                                                                                         |
| 23127  | GLT25D2  | glycosyltransferase 25 domain containing 2                                                                      |
| 5360   | PLTP     | phospholipid transfer protein                                                                                   |
| 10102  | TSFM     | Ts translation elongation factor, mitochondrial                                                                 |
| 7741   | ZNF187   | zinc finger protein 187                                                                                         |
| 5709   | PSMD3    | proteasome (prosome, macropain) 26S subunit, non-ATPase, 3                                                      |
| 351    | APP      | amyloid beta (A4) precursor protein (peptidase nexin-II, Alzheimer disease)                                     |

|        |          |                                                                                           |
|--------|----------|-------------------------------------------------------------------------------------------|
| 57575  | PCDH10   | protocadherin 10                                                                          |
| 8503   | PIK3R3   | phosphoinositide-3-kinase, regulatory subunit 3 (p55, gamma)                              |
| 6376   | CX3CL1   | chemokine (C-X3-C motif) ligand 1                                                         |
| 1031   | CDKN2C   | cyclin-dependent kinase inhibitor 2C (p18, inhibits CDK4)                                 |
| 81607  | PVRL4    | poliovirus receptor-related 4                                                             |
| 6171   | RPL41    | ribosomal protein L41                                                                     |
| 9840   | KIAA0748 | KIAA0748                                                                                  |
| 5354   | PLP1     | proteolipid protein 1 (Pelizaeus-Merzbacher disease, spastic paraplegia 2, uncomplicated) |
| 5007   | OSBP     | oxysterol binding protein                                                                 |
| 55719  | C10orf6  | chromosome 10 open reading frame 6                                                        |
| 57414  | RHBDD2   | rhomboid domain containing 2                                                              |
| 55614  | C20orf23 | chromosome 20 open reading frame 23                                                       |
| 10098  | TSPAN5   | tetraspanin 5                                                                             |
| 699    | BUB1     | BUB1 budding uninhibited by benzimidazoles 1 homolog (yeast)                              |
| 55612  | C20orf42 | chromosome 20 open reading frame 42                                                       |
| 10632  | ATP5L    | ATP synthase, H <sup>+</sup> transporting, mitochondrial F0 complex, subunit G            |
| 55858  | TMEM165  | transmembrane protein 165                                                                 |
| 3815   | KIT      | v-kit Hardy-Zuckerman 4 feline sarcoma viral oncogene homolog                             |
| 29890  | RBM15B   | RNA binding motif protein 15B                                                             |
| 83543  | C9orf58  | chromosome 9 open reading frame 58                                                        |
| 1036   | CDO1     | cysteine dioxygenase, type I                                                              |
| 57326  | PBXIP1   | pre-B-cell leukemia transcription factor interacting protein 1                            |
| 84059  | GPR98    | G protein-coupled receptor 98                                                             |
| 22894  | KIAA1008 | KIAA1008                                                                                  |
| 10174  | SORBS3   | sorbin and SH3 domain containing 3                                                        |
| 10174  | SORBS3   | sorbin and SH3 domain containing 3                                                        |
| 135112 | NCOA7    | nuclear receptor coactivator 7                                                            |
| 27236  | ARFIP1   | ADP-ribosylation factor interacting protein 1 (arfaptin 1)                                |
| 10607  | TBL3     | transducin (beta)-like 3                                                                  |
| 55727  | BTBD7    | BTB (POZ) domain containing 7                                                             |
| 22881  | ANKRD6   | ankyrin repeat domain 6                                                                   |
| 79718  | TBL1XR1  | transducin (beta)-like 1X-linked receptor 1                                               |
| 91     | ACVR1B   | activin A receptor, type IB                                                               |
| 2568   | GABRP    | gamma-aminobutyric acid (GABA) A receptor, pi                                             |
| 714    | C1QC     | complement component 1, q subcomponent, C chain                                           |
| 761    | CA3      | carbonic anhydrase III, muscle specific                                                   |
| 92715  | WDR85    | WD repeat domain 85                                                                       |
| 79832  | QSER1    | glutamine and serine rich 1                                                               |

|        |          |                                                                                     |
|--------|----------|-------------------------------------------------------------------------------------|
| 10144  | FAM13A1  | family with sequence similarity 13, member A1                                       |
| 83719  | YPEL3    | yippee-like 3 (Drosophila)                                                          |
| 1522   | CTSZ     | cathepsin Z                                                                         |
| 51373  | MRPS17   | mitochondrial ribosomal protein S17                                                 |
| 4846   | NOS3     | nitric oxide synthase 3 (endothelial cell)                                          |
| 590    | BCHE     | butyrylcholinesterase                                                               |
| 84498  | FAM120B  | family with sequence similarity 120B                                                |
| 79654  | HECTD3   | HECT domain containing 3                                                            |
| 6498   | SKIL     | SKI-like                                                                            |
| 10476  | ATP5H    | ATP synthase, H+ transporting, mitochondrial F0 complex, subunit d                  |
| 51246  | SCOTIN   | scotin                                                                              |
| 4940   | OAS3     | 2'-5'-oligoadenylate synthetase 3, 100kDa                                           |
| 55713  | ZNF334   | zinc finger protein 334                                                             |
| 8476   | CDC42BPA | CDC42 binding protein kinase alpha (DMPK-like)                                      |
| 80023  | NRSN2    | neurensin 2                                                                         |
| 10653  | SPINT2   | serine peptidase inhibitor, Kunitz type, 2                                          |
| 171568 | POLR3H   | polymerase (RNA) III (DNA directed) polypeptide H (22.9kD)                          |
| 79939  | SLC35E1  | solute carrier family 35, member E1                                                 |
| 79648  | MCPH1    | microcephaly, primary autosomal recessive 1                                         |
| 81846  | SBF2     | SET binding factor 2                                                                |
| 7169   | TPM2     | tropomyosin 2 (beta)                                                                |
| 26287  | ANKRD2   | ankyrin repeat domain 2 (stretch responsive muscle)                                 |
| 10966  | RAB40B   | RAB40B, member RAS oncogene family                                                  |
| 7113   | TMPRSS2  | transmembrane protease, serine 2                                                    |
| 7321   | UBE2D1   | ubiquitin-conjugating enzyme E2D 1 (UBC4/5 homolog, yeast)                          |
| 23623  | RUSC1    | RUN and SH3 domain containing 1                                                     |
| 5920   | RARRES3  | retinoic acid receptor responder (tazarotene induced) 3                             |
| 5523   | PPP2R3A  | protein phosphatase 2 (formerly 2A), regulatory subunit B", alpha                   |
| 55709  | KBTBD4   | kelch repeat and BTB (POZ) domain containing 4                                      |
| 57062  | DDX24    | DEAD (Asp-Glu-Ala-Asp) box polypeptide 24                                           |
| 6662   | SOX9     | SRY (sex determining region Y)-box 9 (campomelic dysplasia, autosomal sex-reversal) |
| 9985   | REC8L1   | REC8-like 1 (yeast)                                                                 |
| 1308   | COL17A1  | collagen, type XVII, alpha 1                                                        |
| 51136  | LOC51136 | PTD016 protein                                                                      |

|       |         |                                                                |
|-------|---------|----------------------------------------------------------------|
| 27238 | GPKOW   | G patch domain and KOW motifs                                  |
| 1300  | COL10A1 | collagen, type X, alpha 1(Schmid metaphyseal chondrodysplasia) |
